# Supplementary material for: Genetic Characteristics of Anelloviruses Detected in Individual Viromes of Children with Acute Respiratory Infection Using the Metagenomic Approach
Source: Preprints.org preprint supplement (doi:10.20944/preprints202404.1211.v1), 2024-04-18
Supplement: Supplementary file 1 [file supplementary]

**Supplementary Table S1.** Distance matrix of multiple alignments of amino acid sequences from ORF1, calculated in relative numbers using the “Simple Similarity” option using UGENE.

|  | **NODE99_E3** | **NODE35_E3** | **NODE28_E3** | **NODE58_E3** | **NODEA508_E2** | **NODEA98_E3** | **NODEA297_E3** |
| --- | --- | --- | --- | --- | --- | --- | --- |
| NODE99_E3 | 100% |  |  |  |  |  |  |
| NODE35_E3 | 40% | 100% |  |  |  |  |  |
| NODE28_E3 | 34% | 36% | 100% |  |  |  |  |
| NODE58_E3 | 44% | 36% | 32% | 100% |  |  |  |
| NODEA508_E2 | 99% | 40% | 33% | 41% | 100% |  |  |
| NODEA98_E3 | 27% | 27% | 25% | 26% | 25% | 100% |  |
| NODEA297_E3 | 28% | 28% | 25% | 27% | 25% | 100% | 100% |
